# Supplementary material for: Local-Scale phylodynamics reveal differential community impact of SARS-CoV-2 in metropolitan US county
Source: PubMed Central journal article supplement — medRxiv. 2022 Dec 16:2022.12.15.22283536. Preprint. [Version 1] doi: 10.1101/2022.12.15.22283536 (PMC9774227; doi:10.1101/2022.12.15.22283536), 2022-12-16
Supplement: NIHPP2022.12.15.22283536v1-supplement-1.pdf [file NIHPP2022.12.15.22283536v1-supplement-1.pdf]

**Supplementary Materials: a list of the supplementary materials, followed by the actual text of the Supplementary Materials.**

1. **Supp.Fig 1:** Number of local outbreak clusters over time by subsampling scheme
2. **Supp.Fig 2:**  $R_t$  estimation using phylodynamic estimates
3. **Supp.Fig 3:** Phylodynamic estimates of SARS-CoV-2 transmission in King County with equal temporal subsampling.
4. **Supp.Fig 4:** Phylodynamic estimates of SARS-CoV-2 transmission in King County with subsampling weighted by hospitalizations.
5. **Supp. Table 1:** Geocoding for different geographical scales in King County, WA
6. **Supp.Table 2:** Sequence Accession IDs and acknowledgements table (**attached .CSV**)

It is made available under a [CC-BY-NC-ND 4.0 International license](https://creativecommons.org/licenses/by-nc-nd/4.0/) .

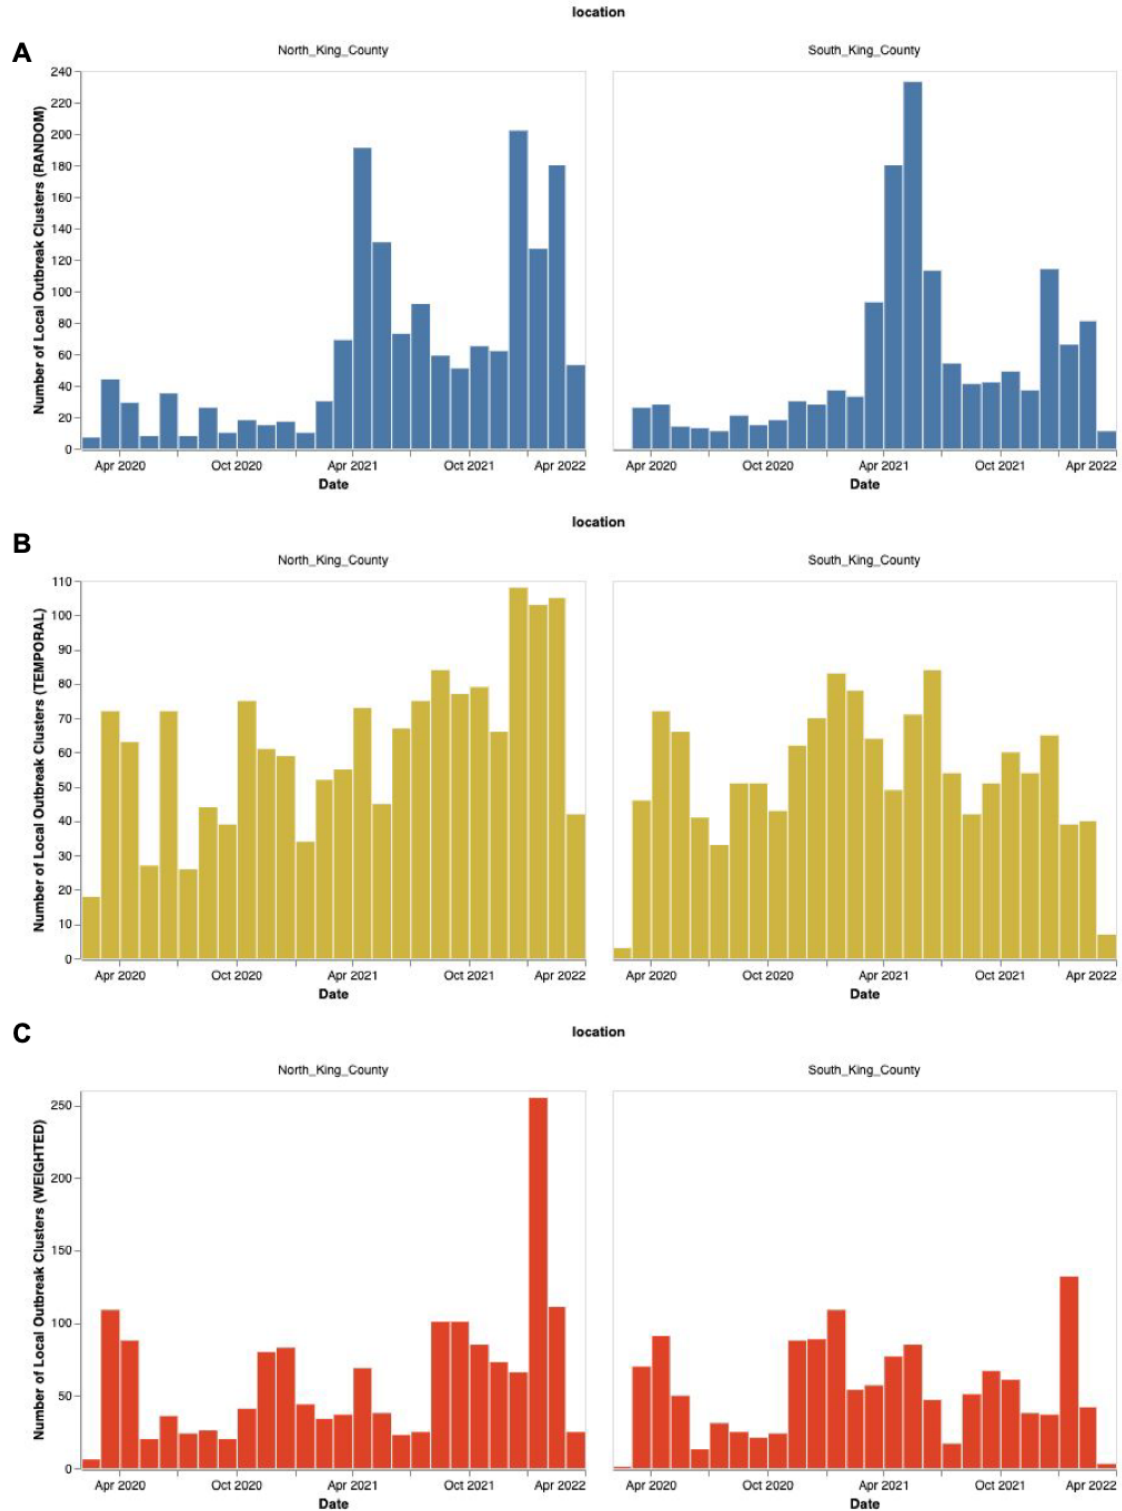

**Supplementary Figure 1:** Number of local outbreak clusters over time by subsampling scheme: random (A, Blue), equal temporal weighting by year-week (B, Gold), and subsampling weighted by daily hospitalizations calculated using a 14 day moving average (C, Red).

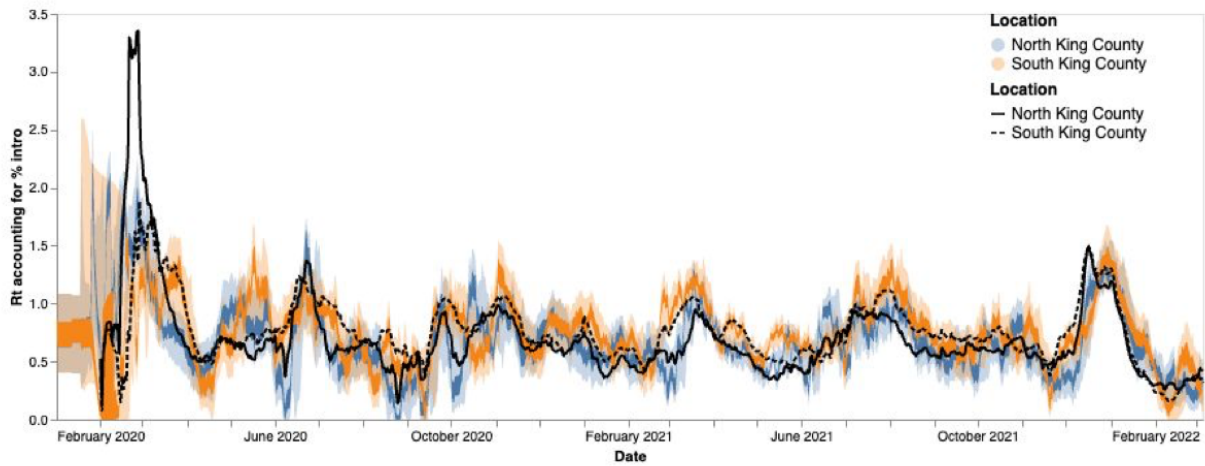

**Supplementary Figure 2:**  $R_t$  estimation using phylodynamic estimates (Blue North King County; Orange = South King County) and case data (Black lines, solid = North King County, dashed = South King County) The inner area denotes the 50% HPD interval and the outer area denotes the 95% HPD interval.

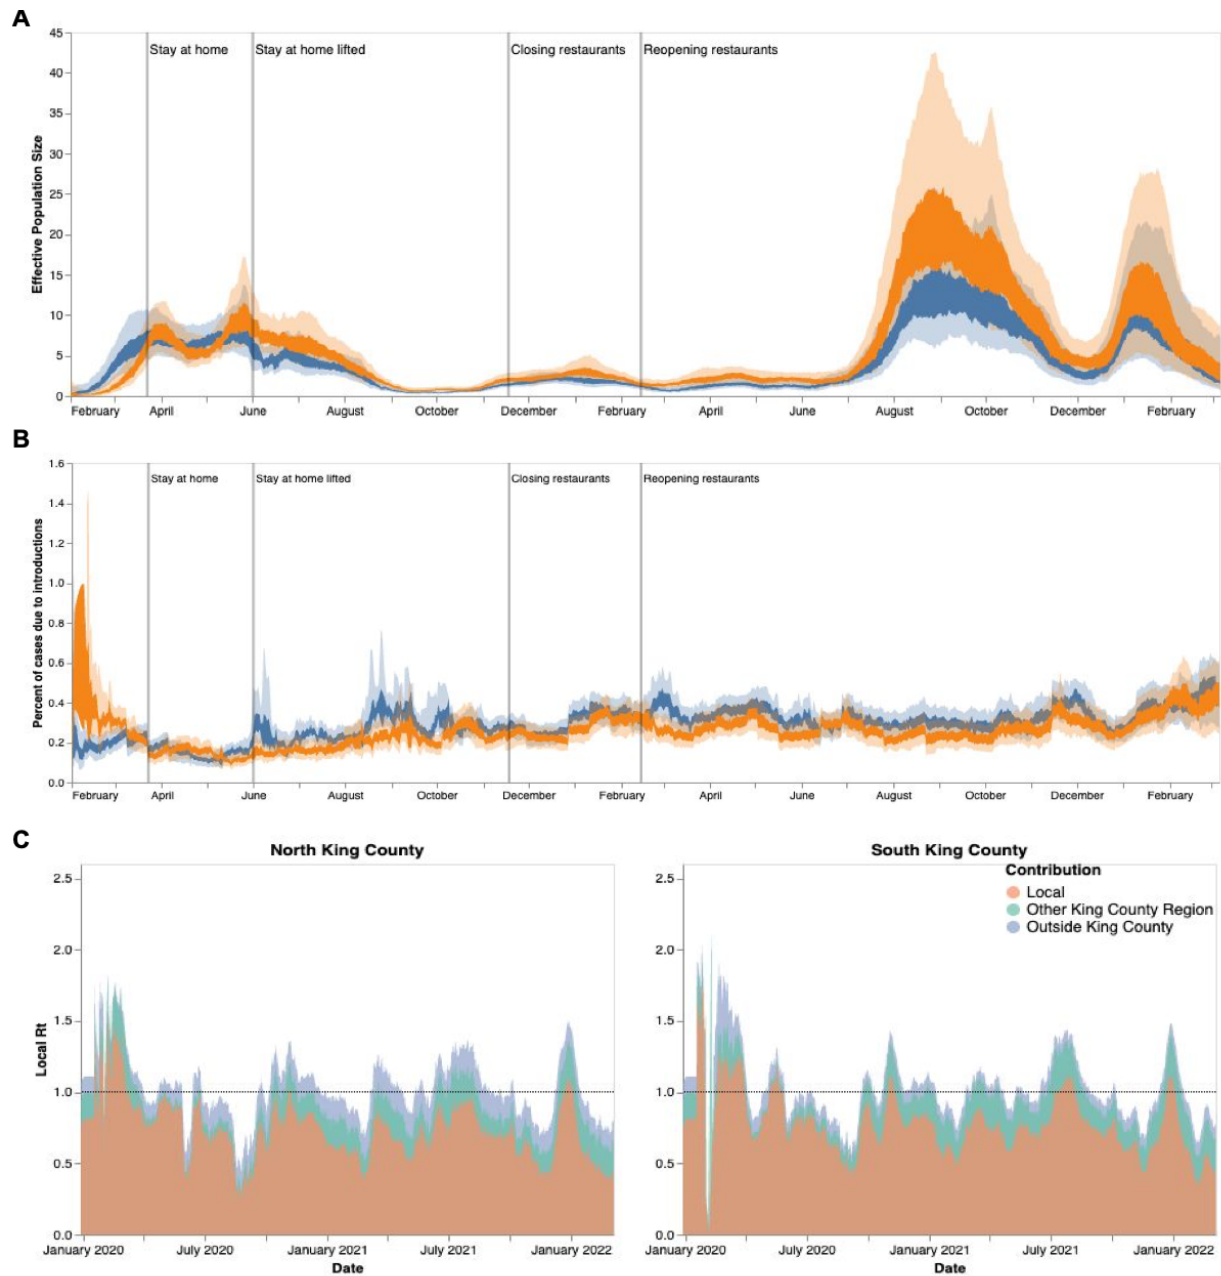

**Supplementary Figure 3:** Phylodynamic estimates of SARS-CoV-2 transmission in King County with equal temporal subsampling. Results presented above were inferred using 3000 sequences subsampled using equal temporal weighting by year-week. Analyses presented, as defined previously, are: effective population size over time (A), percent of cases due to introductions (B), and local  $R_t$  estimations divided by region and source of contribution (C). Orange denotes South King County; blue denotes North King County.

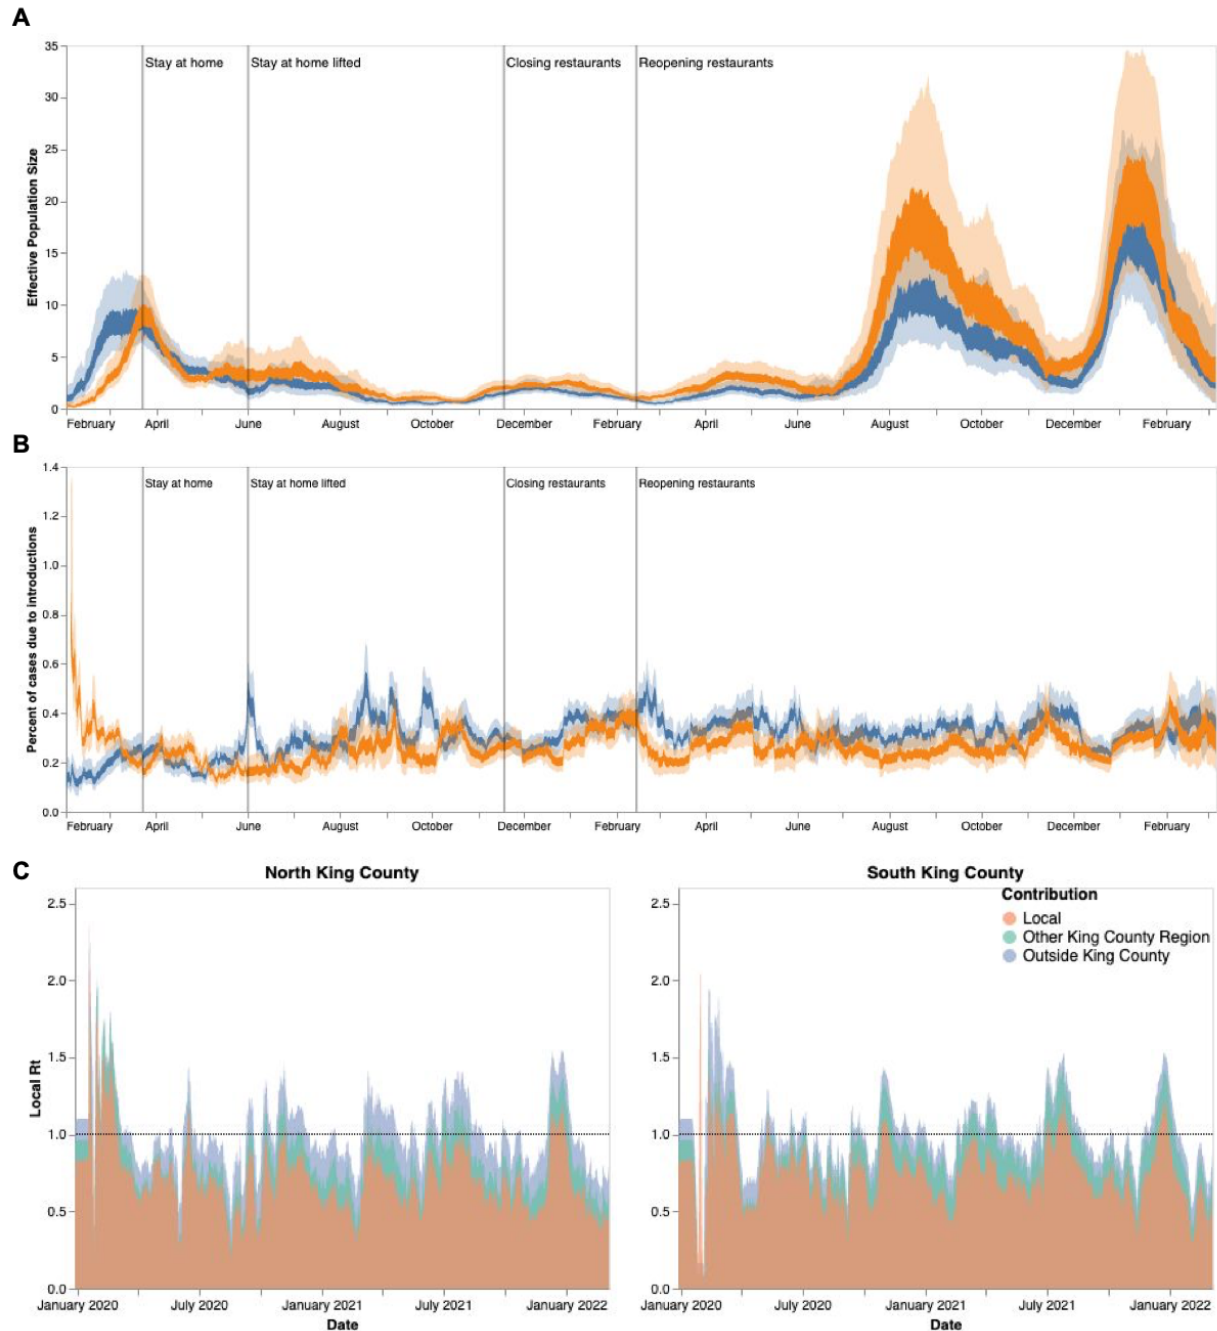

**Supplementary Figure 4:** Phylodynamic estimates of SARS-CoV-2 transmission in King County with subsampling weighted by hospitalizations. Results presented above were inferred using 3000 sequences subsampled using weighting by hospitalizations over time using a 14 day rolling average. Analyses presented, as defined previously, are: effective population size over time (A), percent of cases due to introductions (B), and local  $R_t$  estimations divided by region and source of contribution (C). Orange denotes South King County; blue denotes North King County.

**Supplementary Table 1:** Geocoding for different geographical scales in King County, WA

| Region                  | PUMA  | ZIPCODE |
|-------------------------|-------|---------|
| North<br>King<br>County | 11601 | 98103   |
|                         |       | 98107   |
|                         |       | 98117   |
|                         | 11602 | 98105   |
|                         |       | 98115   |
|                         |       | 98125   |
|                         |       | 98195   |
|                         | 11603 | 98101   |
|                         |       | 98102   |
|                         |       | 98104   |
|                         |       | 98109   |
|                         |       | 98119   |
|                         |       | 98121   |
|                         |       | 98154   |
|                         |       | 98164   |
|                         | 11604 | 98199   |
|                         |       | 98112   |
|                         |       | 98118   |
|                         |       | 98122   |
|                         | 11605 | 98144   |
|                         |       | 98106   |
|                         |       | 98108   |
|                         |       | 98116   |
| 98126                   |       |         |
| 98134                   |       |         |

|       |       |
|-------|-------|
|       | 98136 |
| 11606 | 98133 |
|       | 98155 |
|       | 98177 |
|       | 98011 |
|       | 98028 |
| 11607 | 98033 |
|       | 98034 |
|       | 98052 |
| 11608 | 98004 |
|       | 98005 |
|       | 98006 |
|       | 98007 |
|       | 98008 |
|       | 98039 |
| 11609 | 98040 |
|       | 98029 |
|       | 98076 |
|       | 98075 |
| 11616 | 98045 |
|       | 98065 |
|       | 98014 |
|       | 98077 |
|       | 98053 |
|       | 98024 |
|       | 98072 |
|       | 98019 |

|                         |       |       |
|-------------------------|-------|-------|
| South<br>King<br>County | 11610 | 98055 |
|                         |       | 98057 |
|                         |       | 98056 |
|                         |       | 98178 |
|                         | 11611 | 98146 |
|                         |       | 98148 |
|                         |       | 98166 |
|                         |       | 98168 |
|                         |       | 98188 |
|                         | 11612 | 98003 |
|                         |       | 98023 |
|                         |       | 98198 |
|                         |       | 98070 |
|                         | 11613 | 98030 |
|                         |       | 98031 |
|                         |       | 98032 |
|                         |       | 98092 |
|                         | 11614 | 98001 |
|                         |       | 98002 |
|                         |       | 98047 |
|                         | 11615 | 98010 |
| 98022                   |       |       |
| 98038                   |       |       |
| 98051                   |       |       |
| 98027                   |       |       |
| 98042                   |       |       |
| 98059                   |       |       |



It is made available under a [CC-BY-NC-ND 4.0 International license](#) .

|  |  |       |
|--|--|-------|
|  |  | 98058 |
|--|--|-------|
